# Supplementary material
Source: MDPI journal article supplement (https://www.mdpi.com/2071-1050/10/9/3139)

## Supplementary Materials

1. Being here is an escape experience.

[illegible]

2. Spending time here gives me a break from my day-to-day routine.

[illegible]

3. This place has fascinating qualities.

[illegible]

4. My attention is drawn to many interesting things.

[illegible]

5. I want to get to know this place better.

[illegible]

6. There is nothing worth looking at here.

[illegible]

7. This place is boring.

[illegible]

8. It is easy to see how things are organized.

[illegible]

9. It is a confusing place.

[illegible]

10. There is too much going on.

[illegible]

11. It is chaotic here.

[illegible]

12. Being here suits my personality.

[illegible]

13. I can do things I like here.

[illegible]

14. I have a sense that I belong here.

[illegible]

15. I could find ways to enjoy myself here.

[illegible]

16. I have a sense of oneness with this setting.

|               |   |   |   |   |   |               |   |   |   |    |
|---------------|---|---|---|---|---|---------------|---|---|---|----|
| <= Not at all |   |   |   |   |   | Completely => |   |   |   |    |
| 0             | 1 | 2 | 3 | 4 | 5 | 6             | 7 | 8 | 9 | 10 |
|               |   |   |   |   |   |               |   |   |   |    |

17. Please draw a map of your surroundings (the dot at the center of the box below is your location).



Supplement: s1 [file s1]
